# Supplementary material for: Enhancing Farm Income through Boundary Plantation of Poplar (Populus deltoides): An Economic Analysis
Source: MDPI journal article supplement (doi:10.3390/su14148663), 2022-07-15
Supplement: s1 [file s1]

Archive with 1 entries (1 files):
- sustainability-1739084-supplementary.pdf
