# Supplementary figures and images for: Enhancing Farm Income through Boundary Plantation of Poplar (Populus deltoides): An Economic Analysis
Source: MDPI journal article supplement (doi:10.3390/su14148663), 2022-07-15

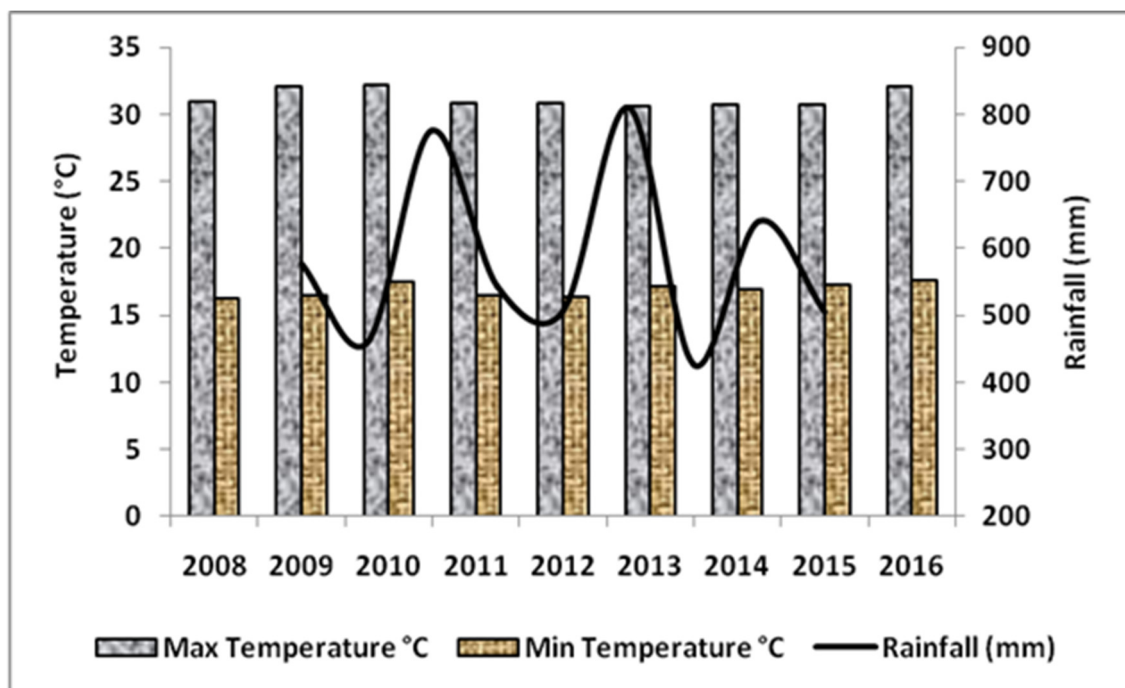

**Figure S1.** Mean yearly meteorological data of study site from 2008–2016.

Supplement: s1 [file s1]
